# Supplementary material for: Spongy titanosilicate promotes the catalytic performance and reusability of WO3 in oxidative cleavage of methyl oleate
Source: Royal Society of Chemistry journal article supplement (doi:10.1039/d1ra08501h), 2022-01-01
Supplement: d1ra08501h1.pdf [file d1ra08501h1.pdf]

## Supplementary Information

### Spongy titanasilicate promotes the catalytic performance and reusability of WO<sub>3</sub> in oxidative cleavage of methyl oleate

Shihao Xin, Xinxin Peng\*, Yao Zhang, Aiguo Zheng, Changjiu Xia, Min Lin, Bin Zhu, Zuoxin Huang, Xingtian Shu

State Key Laboratory of Catalytic Materials and Reaction Engineering, Research Institute of Petroleum Processing, SINOPEC, 100083, Beijing, PR China

\*Corresponding author: pengxx.ripp@sinopec.com

#### 1 Experimental

##### 1.1 Characterization

Nitrogen adsorption-desorption isotherms were collected at 77 K on a Quantachrome Autosorb-iQ2 apparatus. Texture properties were derived from the isotherms using Brunauer-Emmett-Teller (BET) method and t-plot method.

##### 1.2 Catalytic reaction

The reactions were carried out in a 25 mL round-bottom flask under constant temperature and pressure. The reactor was equipped with a condenser, a magnetic stirrer, and an oil bath. A typical procedure for the catalytic oxidative cleavage of MO is as follows: MO, H<sub>2</sub>O<sub>2</sub> (30%), WO<sub>3</sub>, STS and t-BuOH were fed to the flask. Then, the flask was placed into the oil bath under 80 °C and reacted for 4 h.

##### 1.3 Product analysis

The consumption of H<sub>2</sub>O<sub>2</sub> was determined by indirect iodine titration method. Products were determined on Agilent 9790/5875C GC-MS equipped with HP-5MS(30 m×0.25 mm×0.25 m) column. The conversion of MO and product distribution were analyzed on Agilent 9790 GC equipped with a flame ionization detector and SE-54 (30 m×0.25 mm×0.25 m) column with methyl palmitate as internal standard. The conversion and selectivity were calculated according to the following equations.

$$\text{Conversion of MO} = \frac{n_{0,\text{MO}} - n_{\text{MO}}}{n_{0,\text{MO}}} \times 100\%$$

$$\text{Selectivity of Product} = \frac{n_i}{n_{0,\text{MO}} - n_{\text{MO}}} \times 100\%$$

Where,  $n_0$  is three mole of compound,  $i$  refers to generated products, eg. MES, nonyl aldehyde (NA), pelargonic acid (PA), methyl azelaaldehydate (MAA), methyl hydrogen azelate (MHA) and MDS.

## 2 Results

**Table S1** Catalytic performance of different  $\text{WO}_3$  and STS content.

| m( $\text{WO}_3$ ) : m(STS) | Conversion (%) | Selectivity (%) |     |      |     |      |      |
|-----------------------------|----------------|-----------------|-----|------|-----|------|------|
|                             |                | NA              | PA  | MAA  | MHA | MES  | MDS  |
| 0                           | 30.8           | 5.3             | 2.5 | 5.5  | 2.0 | 69.5 | 15.2 |
| 0.01                        | 68.9           | 16.8            | 0   | 15.6 | 0   | 44.9 | 22.7 |
| 0.02                        | 89.5           | 26.1            | 1.8 | 24.3 | 1.5 | 17.2 | 29.1 |
| 0.03                        | 91.9           | 28.5            | 2.6 | 29.7 | 2.3 | 6.3  | 30.6 |
| 0.04                        | 92.1           | 28.3            | 2.8 | 29.9 | 2.6 | 6.2  | 30.2 |

Note:  $n(\text{MO}):n(\text{H}_2\text{O}_2):n(t\text{-BuOH})=1:2.5:20$ ,  $m(\text{catalyst}):m(\text{MO}) = 1:10$ .

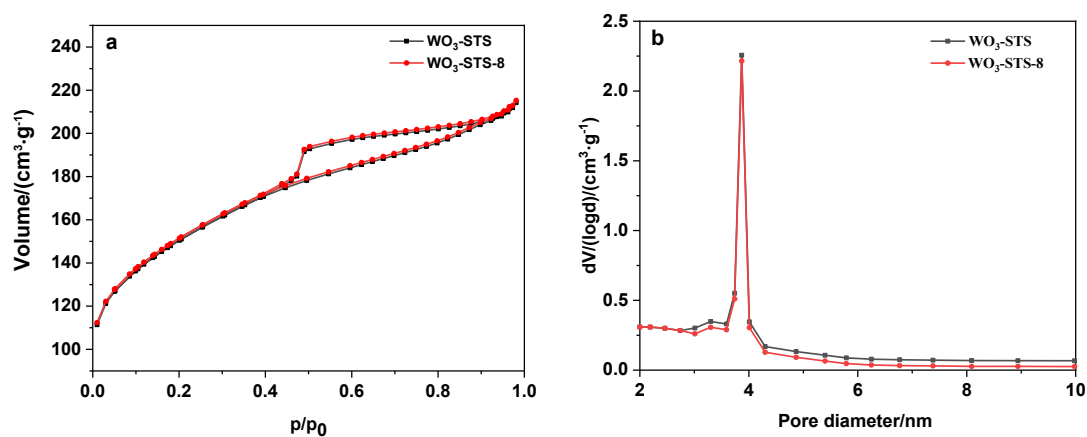

**Fig. S1** (a) Nitrogen adsorption-desorption isotherms of  $\text{WO}_3$ -STS and  $\text{WO}_3$ -STS-8, (b) Pore size distribution of  $\text{WO}_3$ -STS and  $\text{WO}_3$ -STS-8.

**Table S2** Texture properties of  $\text{WO}_3$ -STS and  $\text{WO}_3$ -STS-8.

| Samples              | $S_{\text{BET}}$<br>( $\text{m}^2 \cdot \text{g}^{-1}$ ) | $S_{\text{ext}}$<br>( $\text{m}^2 \cdot \text{g}^{-1}$ ) | $S_{\text{micro}}$<br>( $\text{m}^2 \cdot \text{g}^{-1}$ ) | $V_{\text{meso}}$<br>( $\text{cm}^3 \cdot \text{g}^{-1}$ ) |
|----------------------|----------------------------------------------------------|----------------------------------------------------------|------------------------------------------------------------|------------------------------------------------------------|
| $\text{WO}_3$ -STS   | 528                                                      | 129                                                      | 206                                                        | 0.143                                                      |
| $\text{WO}_3$ -STS-8 | 519                                                      | 132                                                      | 186                                                        | 0.136                                                      |
